# Supplementary material for: Restrictive intraoperative fluid optimisation algorithm improves outcomes in patients undergoing pancreaticoduodenectomy: A prospective multicentre randomized controlled trial
Source: PLoS One. 2017 Sep 7;12(9):e0183313. doi: 10.1371/journal.pone.0183313 (PMC5589093; doi:10.1371/journal.pone.0183313)
Supplement: S1 File — (XLSX) [file pone.0183313.s001.xlsx]

## Sheet: Sheet1
no	group	age	gender	kg	bmi	asa_status	diabetes	copd	malignancy	los	preoperative_hb	wcc	platelets	albumin	bilirubin	urea	creatine	egfr	anaestesia	morphine_dose	intraoperative_fluid_balance	total_mlkghr	intraop_crystalloids	intraop_colloids_excluding_blood	total_intraop_fluids	intraopeartive_blood_tranfusion	blood	urine_output	other_losses	metaraminol	epinephrine	phenylephrine	norad	dopamine_dobutamine	any_beta_blocker	any_drug	duration_surg	day_1_fluid_balance	crystalloids_d1	colloids_d1	total_day_1_iv	blood_day1	day_2_fluid_balance	crystalloids_d2	colloids_d2	total_day_2_iv	blood_day2	complication	number_complications
1	0	75	0	61	19.92	1	0	0	1	12	130	5.9	153	48	8	9.9	52	90	0		900	3.02648	1000	200	1200	0	0	200	100	1	0	0	0	0	0	1	6.5	1597	2627	0	2627	0	-884	1436	0	1436	0	0	0
2	1	67	0	58	20.55	1	1	0	1	18	68	6.3	287	41	30	7.3	60	90	0	400	735	3.0853	1500	200	1700	0	0	265	700	0	1	0	1	0	0	1	9.5	962	2742	500	3242	0	353	2548	0	2548	0	1	1
3	0	53	0	79	25.5	0	0	0	1	9	152	5.7	207	43	12	7.6	105	69	2		3300	8.83132	4000	0	4000	0	0	700		1	1	0	0	0	0	1	5.73333	1295	3050	0	3050	0	-777.5	2487.5	0	2487.5	0	0	0
4	1	48	0	81	26.45	1	1	0	1	7	162	13.8	156	40	7	4.4	79	90	0	400	2950	5.53945	4000	300	4300	0	0	950	400	0	1	0	1	1	1	1	9.58333	1593	2392	0	2392	0	-845	1407	0	1407	0	1	2
5	1	72	1	64.5	25.51	1	1	0	1	8	107	6.8	300	26	293	6.4	88	57	0	400	60	2.18878	1000	0	1000	0	0	790	150	0	0	0	1	1	1	1	7.08333	673	1328	0	1328	0	-497	1172	0	1172	0	0	0
6	0	71	0	79	27.34	0	0	0	1	34	124	10.1	187	29	203	6.3	66	91	1		3470	7.24971	4000	200	4200	1	530	1260		1	1	0	0	0	0	1	7.33333	682	1570	0	1570	0	1781	1140	0	1690	550	1	7
7	1	45	0	79.8	23.32	0	0	0	1	6	145	5.4	211	45		6.1	111	69	1	400	0	3.23706	2000	200	2200	0	0	2000	200	0	1	0	1	0	0	1	8.51667	1729	2018	500	2518	0	340	1370	0	1370	0	1	2
8	1	66	0	103.8	32.04	0	0	0	1	8	138	4.7	104	43	16	9.6	85	82	0	300	600	2.09157	2000	200	2200	0	0	1200	400	0	1	0	1	1	0	1	10.1333	1717	2451	0	2451	0	197	1407	0	1407	0	0	0
9	1	62	0	76	24.82	1	0	1	1	7	137	7.1	252	39	6	6.4	72	90	0	400	1800	4.71869	2100	500	2600	0	0	700	100	0	0	0	1	0	0	1	7.25	1791	1411	500	1911	0	926	1481	0	1481	0	1	2
10	1	73	1	58.1	23.57	1	0	1	1	10	155	10.2	372	47	8	4.4	53	90	0	350	1000	3.80136	1000	200	1200	0	0		200	0	1	0	1	0	0	1	5.43333	1803	2149	0	2149	0	636	1376	0	1376	0	0	0
11	1	56	0	85	28.4	0	0	0	1	9	150	7.8	276	47	6	8.5	77	90	0	350	2400	3.19645	2000	400	2400	0	0			1	0	0	0	0	0	1	8.83333	1214	2048	0	2048	0	328	1644	0	1644	0	1	1
12	0	56	0	103	30.76	1	0	0	1	8	147	9.8	220	37	5	8.3	97	74	2		5190	7.72736	6300	200	6500	0	0	710	600	1	0	0	1	0	1	1	8.16667	726.5	1351	0	1351	0	625	1909	0	1909	0	1	1
13	0	54	0	58	18.94	1	1	0	1	30	126	4.7	223	32	112	3.8	48	91	2		2490	8.62345	5010	200	5210	0	0	1920	800	1	0	0	0	0	0	1	10.4167	3304	3671	1000	4671	0	-763	2092	0	2092	0	1	7
14	1	75	0	84.4	27.88	1	0	0	1	15	146	5.7	186	38	6	5.9	106	58	0	400	1830	4.09889	3000	200	3200	0	0	1170	200	0	0	0	1	0	1	1	9.25	2291	3492	1000	4492	0	585	2215	0	2215	0	1	6
15	0	69	0	85.1	26.27	0	0	0	1	15	120	5.1	300	37	13	4.7	68	91	1		3530	9.34407	5000	500	5500	0	0	1470	500	1	1	0	0	0	0	1	6.91667	853	2746	200	2946	0	368	1703	0	1703	0	1	2
16	0	81	1	58	23.83	1	0	0	1	9	135	5.7	127	37	15	4.8	73	66	0	300	2590	8.3296	3000	100	3100	0	0	110	400	1	0	0	0	0	0	1	6.41667	1177	2532	250	2782	0	540	1481	0	1481	0	0	0
17	0	30	0	54	18.69	1	1	0	0	9	144	6.8	289	42	4	4.7	66	91	0	350	3335	10.8628	3500	0	3500	0	0	165		1	1	0	0	0	0	1	5.96667	670.1	2511	1000	3511	0	-1955	1664	0	1664	0	1	2
18	1	59	1	68.9	26.25	0	0	0	0	6	146	6.8	243	47	8	5.2	68	85	0	350	2000	4.37497	2100	0	2100	0	0		100	0	1	0	1	0	0	1	6.96667	1061	2220	0	2220	0						0	0
19	0	64	1	82	28.71	0	0	1	1	11	146	6.7	196	48	12	4.2	57	91	0	300	890	5.2857	2350	200	2550	0	0	860	800	1	1	0	0	0	0	1	5.88333	1769	2997	0	2997	0	796	2176	0	2176	0	0	0
20	1	80	0	79	24.66	1	0	0	1	17	148	7.2	229	36	12	8.4	69	85	0	400	920	1.98129	1000	500	1500	0	0	280	300	0	0	0	1	1	0	1	9.58333	2480	4180	0	4180	0	-212	2783	0	2783	0	1	3
21	0	56	1	90	33.46	1	1	0	1	16	128	17.9	424	24	226	2.7	51	91	1		2700	5.59896	4000	300	4300	0	0	1600		1	0	0	1	0	0	1	8.53333	1671	1340	1083	2423	0	400	1890	0	1890	0	1	1
22	1	72	1	102	36.57	1	1	0	1	31	140	4.4	102	49	9	5.9	65	82	1	300	1010	2.2338	1000	500	1500	0	0	140	350	0	1	0	1	0	0	1	6.58333	1128	1530	0	1530	0	114	1284	0	1284	0	1	3
23	1	58	1	88.8	34.69	0	0	0	1	7	129	5.6	202	45	11	4.3	101	91	1	400	500	3.5473	2100	0	2100	0	0	1500	100	0	1	0	1	0	0	1	6.66667	2187	2076	0	2076	0	-57	1518	0	1518	0	0	0
24	1	42	1	80	30.11	0	0	0	1	9	134	6.2	180	39	4	2.5	62	91	0	400	1490	3.42324	2200	0	2200	0	0	510	200	0	0	0	1	1	0	1	8.03333	1148.33	2034	0	2034	0	1399.33	1740	0	1740	0	0	0
25	0	82	1	57.8	22.58	1	0	0	1	36	136	6.3	318	34	7	9.3	85	55	1		4800	9.21903	5000	0	5000	0	0		200	0	0	0	1	0	0	1	9.38333	2472	2202	1100	3302	0	672	1604	0	1604	0	1	8
26	1	53	0	109.2	34.86	1	0	0	1	10	145	7	389	45	282	5.6	69	91	1	400	3810	4.72646	2000	2000	4000	0	0	190		0	0	0	1	1	0	1	7.75	1988	2995	0	2995	0	1044	1544	500	2044	0	1	2
27	0	42	1	59	23.05	0	0	0	1	9	117	11.2	512	30	18	7.1	60	91	0	400	4340	11.1889	4000	500	4500	0	0	60	100	0	0	0	0	0	0	0	6.81667	508	3094	0	3094	0	-2503	1565	0	1565	0	1	1
28	1	37	1	58	19.38	0	0	0	1	6	130	6.7	288	40	13	6.3	42	40	2		-350	2.40577	1000	0	1000	0	0	1350		0	1	0	1	0	0	1	7.16667	1363	1500	0	1500	0		1152	0	1152	0	1	1
29	1	57	1	89	30.8	1	1	0	1	7	136	8.6	295	36		2.5	40	91	1	300	3900	5.28751	4000	0	4000	0	0		100	1	0	0	0	0	0	1	8.5	1414	2221	259	2480	0	1770	1376	0	1376	0	1	1
30	0	75	1	72	26.13	1	1	0	1	9	106	8.9	281	32	41	11.7	109	42	0	350	3300	8.23529	4000	200	4200	0	0	500	400	1	0	0	0	0	1	1	7.08333	790	2055	0	2055	0	388	1381	0	1381	0	1	4
31	1	78	0	98	28.02	1	0	0	1	26	129	10.3	238	23	44	3	62	90	0	400	1390	1.94363	1500	500	2000	0	0	510	100	0	0	0	1	0	0	1	10.5	3521	5636	0	5636	0	759	2684	0	2684	0	1	5
32	1	79	0	74	23.1	1	0	1	1	14	143	5.3	530	36	13	6	52	91	1	400	1200	3.03107	1000	1000	2000	0	0		800	1	1	0	1	0	0	1	8.91667	2224	2268	0	2268	0	2087	1570	0	1570	0	1	5
33	0	52	0	75	24.77	0	0	0	1	7	143	4.6	187	44	11	7.2	99	75	0	300	2960	5.87156	4000	0	4000	0	0	740	300	1	0	0	0	0	0	1	9.08333	-1016	249	0	249	0	-764	1740	0	1740	0	0	0
34	1	37	0	100	30.86	1	0	0	1	23	149	5.7	177	42	9	4.4	61	90	0	500	1650	2.6087	2000	1000	3000	0	0	1000	350	0	1	0	1	1	0	1	11.5	1473	3493	0	3493	0	456	1811	0	1811	0	1	4
35	0	54	1	83	32.02	0	1	0	1	15	123	7.3	302	31	13	4.9	63	91	2		2105	5.42169	3000	0	3000	0	0	895		1	0	0	0	0	0	1	6.66667	1093	1760	500	2260	0	-740	2205	0	2205	0	1	2
36	0	70	1	77	34.22	1	1	0	1	13	131	5.7	201	30	43	4.6	56	91	0	300	3760	6.15174	4000	500	4500	0	0	740		1	0	0	0	0	1	1	9.5						-105	1764	0	1764	0	1	1
37	0	67	0	75	29.3	1	0	0	1	12	96	8.2	253	27	64	8.5	101	66	0	400	3872	6.8785	4000	600	4600	0	0	428	300	1	0	0	1	0	0	1	8.91667	682	2137	0	2137	0	1816	2690	0	3240	550	1	4
38	1	53	0	79	27.34	1	0	0	1	11	150	8.5	208	37	10	5.7	83	90	0	500	370	1.44665	1000	200	1200	0	0	480	350	0	0	0	1	1	0	1	10.5	1605	3750	0	3750	0	117	2897	0	2897	0	1	1
39	0	48	1	79	30.48	1	0	0	1	20	153	12.6	283	39	6	4.8	81	74	0	300	2426	5.82423	4026	0	4026	0	0	1600		1	0	0	1	0	0	1	8.75	1250	3980	0	3980	0	-2724	2421	0	2421	0	1	4
40	0	70	0	86	30.84	1	1	0	1	55									0	350	1100	2.02224	1000	1000	2000	0	0	400	500	0	0	0	1	1	0	1	11.5	3255	3855	1375	5230	0	391	2511	0	2511	0	1	16
41	1	78	1	59.6	21.89	1	1	0	1	8	126	13.3	345	30	8	5.2	56	85	0	300	700	2.63895	1250	100	1350	0	0	400	250	0	0	0	1	1	0	1	8.58333	1266	1750	0	1750	0	-1657	1066	0	1066	0	1	1
42	0	75	1	71	29.17	1	0	0	1	10	144	6.1	203	37	8	6.2	70	73	0	200	2831	6.1309	2200	1500	3700	0	0	669	200	1	1	0	0	0	0	1	8.5	1089	2499	0	2499	0	695	2015	0	2015	0	1	2
43	1	71	1	59	22.21	1	1	0	1	10	120	8.6	159	38	27	4	57	90	0	300	810	3.21142	1000	200	1200	0	0	240	150	0	0	0	1	0	1	1	6.33333	1992	2461	500	2961	0	-954	2086	0	2086	0	0	0
44	1	57	0	80	28.34	1	0	0	1	10	157	7.9	210	43	9	6.5	79	90	0	350	400	1.66667	1000	200	1200	0	0	400	400	0	0	0	1	1	1	1	9	2509	3489	0	3489	0	-969	1402	0	1402	0	1	2
45	0	56	1	115	37.13	1	1	0	1	11	125	12	381	21	411	4.2	36	91	0	400	3880	4.19616	4150	0	4150	0	0	270		1	0	0	1	0	0	1	8.6	2686	2729	1000	3729	0	-1665	720	0	720	0	1	3
46	0	73	0	84.6	29.97	1	1	1	1	29	145	6.2	211	42	4	7.5	123	50	0	250	3725	6.75447	2000	2000	4000	0	0	275		1	0	1	0	0	1	1	7	1424	3504	0	3504	0	666	3226	0	3226	0	1	6
47	0	57	0	102	29.8	1	1	0	1	10	146	8	208	34	10	6.1	74	90	0	350	3165	3.61991	2100	1500	3600	0	0	435		1	0	1	0	0	0	1	9.75	1063	3458	0	3458	0	-343	2837	0	2837	0	1	2
48	0	85	1	68.1	26.6	1	0	0	1	15	141	10	374	35	7	6.7	76	61	0	500	4095	8.66208	4375	0	4375	0	0	280		1	0	0	1	0	0	1	7.41667	1701	2754	250	3004	0	593	1936	0	1936	0	1	7
49	1	69	1	62	22.5	1	0	0	1	14	135	10.3	445	43	7	7.7	88	58	0	300	300	3.22581	1500	0	1500	0	0	1000	200	0	0	0	1	1	0	1	7.5	1887	2767	500	3267	0	-555	1830	0	1830	0	1	1
50	0	72	0	56.4	20.22	1	0	0	1	14	131	7.7	304	40	8	6	160	34	0	400	2230	4.90998	2000	400	2400	0	0	170		1	0	0	0	0	0	1	8.66667	1749	2679	250	2929	0	55	2080	0	2080	0	1	3
51	1	60	0	121.3	43.49	1	0	1	1	8	144	8	194	40	10	9.3	97	72	0	400	4600	3.17343	4000	600	4600	0	0			0	0	0	1	1	0	1	11.95	1333	2452	300	2752	0	978	3118	0	3118	0	1	1
52	0	75	0	96.7	33.46	1	1	0	1	37	147	7.2	179	40	8	6.8	80	82	0	300	4200	7.16994	5000	200	5200	0	0	1000		1	1	0	0	0	0	1	7.5	-521	828	0	828	0	-66	999	0	999	0	1	9
[truncated: 41 more columns]
